# Supplementary material for: Quality of Life (QoL) and Psychosocial Outcomes in Adult Survivors of Unilateral Retinoblastoma (RB) in China
Source: Hindawi journal article supplement (doi:10.1155/2020/4384251), 2020-03-23
Supplement: f1 [file 4384251.f1.pdf]

## Supplementary Materials

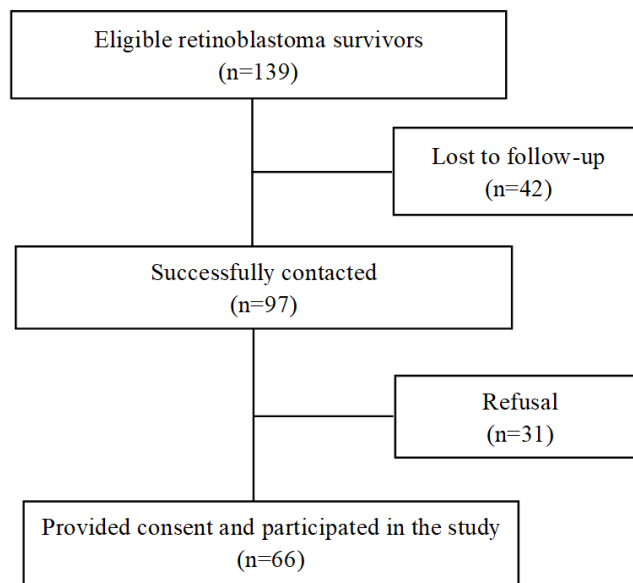

Figure S1: Recruitment and participation for retinoblastoma survivors.

**Table S1: Male versus female in the FoP-Q-SF**

| Item                                                                                | All RB survivors<br>(n=64) | Male<br>(n=30) | Female<br>(n=34) | <i>p</i> |
|-------------------------------------------------------------------------------------|----------------------------|----------------|------------------|----------|
| Item 1 Being afraid of disease progression                                          |                            |                |                  | 0.007    |
| Never/ Few/ Sometime                                                                | 56 (87.5%)                 | 30 (100.0%)    | 26 (76.5%)       |          |
| Often/ Always                                                                       | 8 (12.5%)                  | 0              | 8 (23.5%)        |          |
| Item 2 Being nervous prior to doctor's appointments or periodic examinations        |                            |                |                  | 0.364    |
| Never/ Few/ Sometime                                                                | 52 (81.3%)                 | 24 (80.0%)     | 28 (82.4%)       |          |
| Often/ Always                                                                       | 12 (18.7%)                 | 6 (20.0%)      | 6 (17.6%)        |          |
| Item 3 Being afraid of pain                                                         |                            |                |                  | 0.886    |
| Never/ Few/ Sometime                                                                | 54 (84.4%)                 | 27 (90.0%)     | 27 (79.4%)       |          |
| Often/ Always                                                                       | 10 (15.6%)                 | 3 (10.0%)      | 7 (20.6%)        |          |
| Item 4 Being afraid of becoming less productive at work                             |                            |                |                  | 0.081    |
| Never/ Few/ Sometime                                                                | 57 (89.1%)                 | 29 (96.7%)     | 28 (82.4%)       |          |
| Often/ Always                                                                       | 7 (10.9%)                  | 1 (3.3%)       | 6 (17.6%)        |          |
| Item 5 Having physical symptoms (e.g., rapid heartbeat, stomachache)                |                            |                |                  | 0.047    |
| Never/ Few/ Sometime                                                                | 62 (96.9%)                 | 29 (96.7%)     | 33 (97.1%)       |          |
| Often/ Always                                                                       | 2 (3.1%)                   | 1 (3.3%)       | 1 (2.9%)         |          |
| Item 6 Being afraid by the possibility that the children could contract the disease |                            |                |                  | 0.058    |
| Never/ Few/ Sometime                                                                | 48 (75.0%)                 | 27 (90.0%)     | 21 (61.8%)       |          |
| Often/ Always                                                                       | 16 (25.0%)                 | 3 (10.0%)      | 13 (38.2%)       |          |
| Item 7 Being afraid of relying on strangers for activities of daily living          |                            |                |                  | 0.007    |
| Never/ Few/ Sometime                                                                | 57 (89.1%)                 | 30 (100.0%)    | 27 (79.4%)       |          |
| Often/ Always                                                                       | 7 (10.9%)                  | 0              | 7 (20.6%)        |          |
| Item 8 Being afraid of no longer being able to pursue hobbies                       |                            |                |                  | 0.080    |
| Never/ Few/ Sometime                                                                | 60 (93.7%)                 | 29 (96.7%)     | 31 (91.2%)       |          |
| Often/ Always                                                                       | 4 (6.3%)                   | 1 (3.3%)       | 3 (8.8%)         |          |
| Item 9 Being afraid of severe medical treatments in course of illness               |                            |                |                  | 0.176    |
| Never/ Few/ Sometime                                                                | 53 (82.8%)                 | 26 (86.7%)     | 27 (79.4%)       |          |
| Often/ Always                                                                       | 11 (17.2%)                 | 4 (13.3%)      | 7 (20.6%)        |          |
| Item 10 Worrying that medications could damage the body                             |                            |                |                  | 0.231    |
| Never/ Few/ Sometime                                                                | 53 (82.8%)                 | 27 (90.0%)     | 26 (76.5%)       |          |
| Often/ Always                                                                       | 11 (17.2%)                 | 3 (10.0%)      | 8 (23.5%)        |          |
| Item 11 Worrying what will become of family if something happens to me              |                            |                |                  | 0.565    |
| Never/ Few/ Sometime                                                                | 52 (81.3%)                 | 25 (83.3%)     | 27 (79.4%)       |          |
| Often/ Always                                                                       | 12 (18.8%)                 | 5 (16.7%)      | 7 (20.6%)        |          |
| Item 12 Being afraid of not being able to work anymore                              |                            |                |                  | 0.068    |
| Never/ Few/ Sometime                                                                | 49 (76.6%)                 | 26 (86.7%)     | 23 (67.6%)       |          |
| Often/ Always                                                                       | 15 (23.4%)                 | 4 (13.3%)      | 11 (32.4%)       |          |
